# Supplementary material for: Kinome-wide identification of phosphorylation networks in eukaryotic proteomes
Source: PubMed Central journal article supplement (PMC6361239; doi:10.1093/bioinformatics/bty545), 2018-07-17

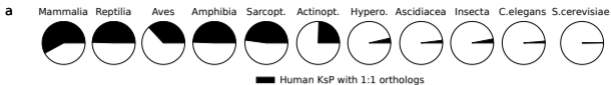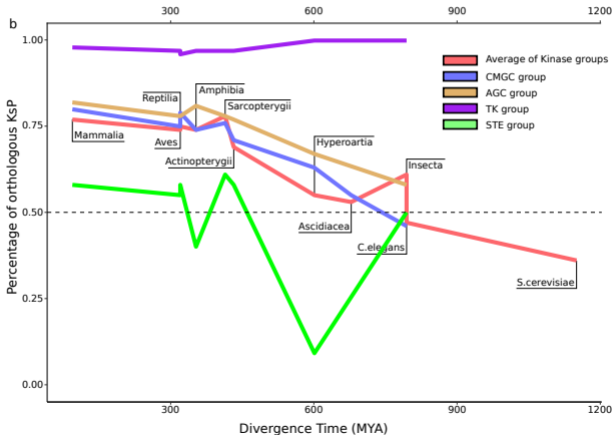

Supplement: bty545_supplementary_figure_s3.pdf [file bty545_supplementary_figure_s3.pdf]
